# Supplementary material for: The Polypharmacy Dilemma in Psychiatry: A Patient- Centered Mixed-Methods Exploration
Source: Research Square preprint supplement (doi:10.21203/rs.3.rs-6790258/v1), 2025-08-07
Supplement: Supplementary file 1 [file 6cb2e8a2a81a9c27b9222a3a.pdf]

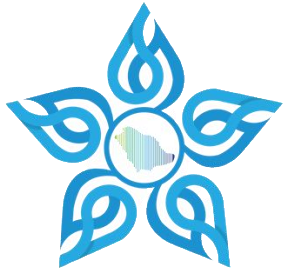

## تسهيل مهمة باحث

المحترم سعادة المشرف العام على مجمع إرادة للخدمات النفسية

نفيدكم علما بان البحث بعنوان

(Understanding Healthcare Providers' Knowledge and Attitudes Toward Polypharmacy in Psychiatry Versus Psychiatric Patients' Perspectives on Medication Management: A Mixed-Methods Study)

للباحثة (د/ أمل خليل) حصل على الموافقة الأخلاقية من اللجنة المحلية للبحوث الطبية بالشؤون الصحية  
برقم (A02107) وتاريخ ( 12/03/2025 )

نأمل منكم الإيعاز لمن يلزم بتسهيل مهمة الباحثة والسماح لها بإجراء البحث في منشأتكم بعد استيفاء الضوابط  
اللازمة لجمع البيانات المعدة من قبل إدارة البحوث بالمنشأة لديكم

مع ضرورة تقيد الباحثين بالشروط التي تم الإقرار عليها في اتفاقية مشاركة البيانات واتفاقية عدم الإفصاح

|                                                                                                                                                                                         |                          |
|-----------------------------------------------------------------------------------------------------------------------------------------------------------------------------------------|--------------------------|
| Understanding Healthcare Providers' Knowledge and Attitudes Toward Polypharmacy in Psychiatry Versus Psychiatric Patients' Perspectives on Medication Management: A Mixed-Methods Study | عنوان البحث              |
| A02107                                                                                                                                                                                  | رقم الموافقة الأخلاقية   |
| 12/03/2025                                                                                                                                                                              | تاريخ الموافقة الاخلاقية |
| 6 أشهر                                                                                                                                                                                  | مدة البحث                |
| د/ أمل خليل                                                                                                                                                                             | الباحث الرئيسي           |
| جامعة الملك سعود الصحية بالحرس الوطني                                                                                                                                                   | جهة عمل الباحث الرئيسي   |
| تمريض                                                                                                                                                                                   | التخصص                   |
| 0595138896                                                                                                                                                                              | بيانات التواصل مع الباحث |

نائب الرئيس التنفيذي للشؤون الأكاديمية والتدريب

والبحوث لتجمع جدة الصحي الأول

*Zainab*

د. زينب أحمد عز الدين خلف
