# Supplementary material for: The Polypharmacy Dilemma in Psychiatry: A Patient- Centered Mixed-Methods Exploration
Source: Research Square preprint supplement (doi:10.21203/rs.3.rs-6790258/v1), 2025-08-07
Supplement: Supplementary file 1 [file e008e77b70b8593ca445970f.docx]

| **RS-MOH Data Sharing Agreement**  This Agreement sets forth the terms and conditions under which the Provider will disclose certain data and protected health information, the party holding the data (“Provider”) you request will be shared with you, the Data Recipient, for purposes outlined in study proposal | **إتفاقية تبادل بيانات الدراسات البحثية - وزارة الصحة**  تستعرض هذه الإتفاقية الشروط والأحكام التي سيقوم بموجبها المزود بالكشف عن بعض البيانات ومعلومات الصحة المحمية، ويتم تبادل البيانات التي يتم طلبها بين الطرف الحاصل عليها ("المزود") ومتلقي البيانات للأغراض التي تم بيانها في المقترح البحثي |
| --- | --- |
| [**Understanding Healthcare Providers' Knowledge and Attitudes Toward Polypharmacy in Psychiatry Versus Psychiatric Patients' Perspectives on Medication Management: A Mixed-Methods Study**] | [**Understanding Healthcare Providers' Knowledge and Attitudes Toward Polypharmacy in Psychiatry Versus Psychiatric Patients' Perspectives on Medication Management: A Mixed-Methods Study**] |
| **The PI will keep the study data for at least 3 years after completion of study** | **أقل مدة لحفظ الباحث الرئيس بالبيانات بعد انتهاء البحث هي 3 سنوات** |
| **Study Information:**   - **Provider’s Name:** - **Recipient’s Name: Amal Khalil** - **Date: 12/10/2024** - **Brief description of the research:** | **معلومات الدراسة:**   - **اسم المزود:** - **اسم المتلقي (الباحث الرئيس):** - **التاريخ: 12/10/2024** - **وصف مختصر للبحث:** |
| **This study investigates polypharmacy in psychiatric care, where multiple psychiatric medications are often prescribed. Despite its prevalence, both healthcare providers and patients generally have negative views on polypharmacy, and research on providers' knowledge and patient understanding is lacking. Utilizing a convergent mixed-methods approach, the research gathers quantitative and qualitative data from healthcare providers and patients to achieve a comprehensive understanding of polypharmacy's challenges and implications.The significance of the study lies in the high prevalence of polypharmacy, impacting 68.5% of patients, and the associated risks, including drug interactions, cognitive impairment, and increased healthcare costs. There is a notable gap in psychiatric-specific research, exacerbated by stigma and negative attitudes toward mental illness, which can delay treatment and diminish care quality.The study aims to assess healthcare providers' knowledge and attitudes about polypharmacy, while also exploring patients' perspectives to improve medication management and outcomes in psychiatric settings.** | Click or tap here to enter text. |
| - **The purpose of this research is to:** Provide complete description of the purpose of the research project: | - **الغرض من هذا البحث هو:**   يتم تقديم وصف كامل للغرض من المشروع البحثي: |
| **Assessing healthcare providers' knowledge and attitudes toward polypharmacy in psychiatric practices and exploring patients' perspectives and opinions regarding polypharmacy.** | Click or tap here to enter text. |
| - **The Recipient agrees to use the information solely in the following manner:** Provide complete description of all proposed uses of the data set: | - **يوافق المتلقي على إستخدام المعلومات فقط بالطريقة التالية**:   يتم إدراج وصف كامل للاستخدامات المقترحة لمجموعة  البيانات: |
| **The data will be used to gather insights and findings that will be shared with the Ministry of Health, Saudi Arabia, as part of the approved research procedures, ensuring participants are informed about the study’s purpose.** | Click or tap here to enter text. |
| - **The recipient agrees to limit access to the information to the following individuals or classes of individuals:** Provide a complete list of all individuals, or classes of individuals, who will access the limited data set: | - **يوافق المتلقي على الحد من الإطلاع على المعلومات على الأفراد وفئات الأفراد التالية:** يتم إدراج قائمة كاملة بكافة الأفراد، أو فئات الأفراد، الذين سيطلعون على مجموعة البيانات المحدودة: |
| **Formal approval will be sought from the research unit at the College of Nursing, Jeddah, the KAIMRC, and the IRB. A letter of approval will be submitted to the previously mentioned settings for approval. An IRB approval will be received from Ministry of Health, Saudi Arabia which will be sent to the Erada complex for Addiction and Mental health hospital managers to start data collection. A short explanation of the study's purpose and procedures will be provided to study subjects following the presentation. All subjects will be informed that participation in the study is voluntary and that they can withdraw at any time without incurring any penalties. In addition, all their answers and information remained anonymous during the study and kept confidential.** | Click or tap here to enter text. |
| **Conditions and Stipulations:** | **الشروط والإشتراطات:** |
| Recipient further agrees to the following conditions and stipulations: | يوافق المتلقي أيضا على الشروط والإشتراطات التالية: |
| 1. The information will not be used or further disclosed other than as permitted by this agreement or as otherwise required by Saudi Law. | 1. لن يتم إستخدام المعلومات أو الكشف عنها بخلاف ما هو مسموح بهذه الإتفاقية أو بخلاف ذلك على النحو المطلوب بالقانون السعودي. |
| 1. Appropriate safeguards will be implemented as described above to prevent use or disclosure of information other than as provided for by this agreement. | 1. سيتم تطبيق الضمانات المناسبة على النحو الموضح أعلاه للحيلولة دون إستخدام المعلومات أو الكشف عنها بخلاف ما هو منصوص عليه في هذه الإتفاقية. |
| 1. Information set will not be re-identified. | 1. لن يُعاد تحديد مجموعة المعلومات. |
| 1. Individuals whose information is contained in the information will not be contacted. | 1. لن يتم التواصل مع الأفراد المدرجة معلوماتهم في المعلومات. |
| 1. You will use the information only for the research purposes described above. | 1. سيتم إستخدام المعلومات فقط للأغراض البحثية الموضحة أعلاه. |
| 1. Recipient-investigator agrees to take the appropriate safeguards to prevent unauthorized use or disclosure of the information. | 1. يوافق الباحث المتلقي على إتخاذ الضمانات المناسبة للحيلولة دون الإستخدام أو الكشف غير المصرح به للمعلومات. |
| 1. Upon learning of any use or disclosure of information not provided for by this agreement, such unauthorized use or disclosure will be reported to the holder within 15 days of becoming aware of such use a disclosure. | 1. عند العلم بأي إستخدام أو كشف للمعلومات غير منصوص عليه في هذه الإتفاقية، يتم الإبلاغ عن ذلك الإستخدام أو الكشف غير المصرح للمالك خلال 15 يوما من علمه بذلك الإستخدام أو الكشف. |
| 1. Any individuals or organizations, including subcontractors, to whom the information is provided, must first agree to the same restrictions and conditions set forth in this agreement. | 1. يجب على أي أفراد أو مؤسسات، بما في ذلك المقاولين من الباطن، الذين يتم تقديم المعلومات لهم، الموافقة أولا على نفس القيود والشروط المنصوص عليها في هذه الإتفاقية. |
| 1. Recipient and Provider understand and agree that individuals who are the subject of PHI are not intended to be third party beneficiaries of this agreement. | 1. يفهم ويوافق المتلقي والمزود بأن الأفراد موضوع المعلومات الصحية المحمية لا يقصد بهم أن يكونوا أطرافا أخرى مستفيدة في هذه الإتفاقية. |
| 1. Each party agrees that it will be responsible for its own acts and the results thereof to the extent authorized by law and shall not be responsible for the acts of the other party or the results thereof. | 1. يوافق كل طرف على أنه سيكون مسئولا عن تصرفاته والنتائج المترتبة عليها إلى الحد المصرح به قانونا وأنه لن يكون مسئولا عن تصرفات الطرف الآخر أو النتائج المترتبة عليها. |
| **Term and Termination:** | **المدة والإنهاء:** |
| 1. The term of this agreement shall be effective as soon as the study is approved and shall remain in effect until the research proposed is completed, after which you agree to destroy or return the information safely and promptly to the Provider. | 1. يبدأ سريان مفعول هذه الإتفاقية إعتبارا من تاريخ اخذ الموافقة الأخلاقية وتبقى سارية المفعول ونافذة حتى يتم إستكمال البحث المقترح، وبعد ذلك يوافق الطرف على إتلاف أو إعادة كافة المعلومات للمزود بشكل سليم وعلى الفور. |
| 1. Upon the Provider’s knowledge of a material breach of this agreement by the Data Recipient, the Provider shall provide an opportunity for Data Recipient to rectify the breach or end the violation. If efforts to cure the breach or end the violation are not successful within the 15 days period specified by the Provider, the Provider shall discontinue disclosure of PHI to the Data Recipient. | 1. عند علم المزود بأي مخالفة مادية لهذه الإتفاقية من قبل متلقي البيانات، يمنح المزود لمتلقي البيانات الفرصة لتصحيح المخالفة أو إنهاء الإنتهاك. وإذا لم تنجح جهود تصحيح المخالفة أو إنهاء الإنتهاك خلال فترة الـ 15 يوما التي يحددها المزود، يتوقف المزود عن الكشف عن المعلومات الصحية المحمية لمتلقي البيانات. |
| 1. The Data Recipient agrees to destroy study data according to the following specifications: | 1. يوافق متلقي البيانات على إتلاف بيانات الدراسة وفقا للمواصفات التالية: |
| - [Insert any specifications regarding the destruction of data pieces here]. | - - [يتم إدراج أي مواصفات تتعلق بإتلاف البيانات]. |
| - Unless otherwise required by Saudi law, the Data Recipient will destroy Data Set(s) not less than 3 year(s) of the study end date. The Data Recipient will notify the Holder with written confirmation of the destruction via email or another memo. | - - مالم يُنص على خلاف ذلك بالقانون السعودي، سيقوم متلقي البيانات بتدمير مجموعة (مجموعات) البيانات في مدة لا تقل عن 3 (أعوام) من تاريخ إنتهاء الدراسة. وسيقوم متلقي البيانات بإبلاغ المزود بتأكيد خطي بالإتلاف عبر البريد الإلكتروني أو أي مذكرة أخرى. |
| - When printed material containing confidential information is discarded, it is loaded, transported and stored under supervision (using a chain of custody control process) until the material can be recycled into paper pulp. | - - عندما يتم التخلص من المواد المطبوعة التي تحتوي على معلومات سرية، فيتم تحميلها، ونقلها وتخزينها تحت إشراف (بإستخدام سلسلة من عملية مراقبة العهدة) إلى أن يتم إعادة تدوير المواد إلى لب ورق. |
| 1. This agreement shall not be amended, altered, or changed except by written documentation agreed to and executed by both parties. | 1. لا يتم تعديل هذه الإتفاقية، أو تغييرها، أو تبديلها إلا بوثيقة خطية تتم الموافقة عليها وتوقيعها من قبل الطرفين. |
| **Ownership of Data:** | **ملكية البيانات:** |
|  |  |
| **All data shall remain exclusively owned by the disclosing party and its use by other parties shall be governed by the following:** | **تبقى كافة البيانات ملكا خالصا وحصريا للطرف المصرح ويُنظم استخدامها من قبل الطرف الآخر بالتالي:** |
| 1. Information may be disclosed to study sites provided solely as necessary to perform obligations in connection with the research project for which such data are provided under this agreement. Such uses and disclosures shall also be in compliance with applicable laws and regulations, protocols, consent forms(if any), and IRB approvals. | 1. يجوز الكشف عن المعلومات لمواقع الدراسة المنصوص عليها حصرا على أنها ضرورية لأداء الإلتزامات المتصلة بالمشروع البحثي والذي يتم تقديم هذه البيانات له بموجب هذه الإتفاقية. وتكون عمليات الإستخدام والكشف هذه متفقة مع القوانين والأنظمة والمطبقة، والبروتوكلات، و نماذج الموافقة، إن وجدت، و موافقات لجنة أخلاقيات البحوث. |
| 1. No party shall use the names, logos, symbols or trademarks of another party or the other party’s affiliates or related entities, without the express written permission of the other party, except that parties may identify each other in annual reports and like documents that generally describe or refer to the research project. | 1. لا يقوم أي طرف بإستخدام الأسماء، والشعارات، والرموز والعلامات التجارية الخاصة بالطرف الآخر أو التابعين للطرف الآخر أو الكيانات ذات العلاقة دون الإذن الخطي الصريح من الطرف الآخر، بإستثناء أنه يجوز للأطراف تمييز بعضهم البعض في التقارير السنوية والوثائق المماثلة التي تصف بشكل عام المشروع البحثي أو تشير إليه. |
| 1. The Provider retains any and all tangible and intangible rights to the information. | 1. يحتفظ المزود بأي من وكافة الحقوق المادية وغير المادية للمعلومات. |
| 1. Recipient abides to submit a final draft of the research including the results (or published paper) to the provider or uploading it to the research data base at MOH electronic site. | 1. يلتزم الطرف المتلقى بتزويد الطرف المزود بنسخة نهائية من البحث أو الدراسة شاملة النتائج (أو نسخة من البحث منشورة بإحدى الدوريات العلمية) أو رفعها بقاعدة البيانات البحثية بموقع وزارة الصحة. |
| 1. The Products created by the Data Recipient shall be owned by the Data Recipient. Products jointly created by both the Data Recipient and the Holder shall be jointly owned. | 1. تكون المنتجات التي يتم إنشاؤها من قبل متلقي البيانات ملكا لمتلقي البيانات. وبالنسبة للمنتجات التي يتم إنشاؤها بشكل مشترك من قبل كل من متلقي البيانات ومالكها، فتبقى مملوكة بشكل مشترك. |
| 1. The Data Recipient agrees not to use or disclose the Data Set for any purpose or secondary use other than the reporting purposes outlined above or as required by Saudi law. | 6. يوافق متلقي البيانات على عدم إستخدام مجموعة البيانات أو الكشف عنها لأي غرض أو إستخدام ثانوي بخلاف أغراض الإبلاغ المحددة أعلاه أو على النحو المطلوب بالقانون السعودي. |
| 1. The Data Recipient agrees to report to the Provider any use or disclosure of the Data Set not provided for by this agreement, of which it becomes aware, including without limitation, any disclosure of PHI to an unauthorized subcontractor, within ten (10) business days of its discovery. | 1. يوافق متلقي البيانات على إبلاغ المزود بأي إستخدام أو كشف لمجموعة البيانات غير منصوص عليه بهذه الإتفاقية، قد يطلع عليه، بما في ذلك على سبيل المثال لا الحصر، أي كشف للمعلومات الصحية المحمية لأي مقاول من الباطن غير مصرح له، خلال عشرة (10) أيام عمل من إكتشافه لذلك. |
| 8. The Data Recipient agrees not to identify the information contained in the Data Set, contact the individual, or publish or disclose publicly any PHI. | 1. يوافق متلقي البيانات على عدم تحديد المعلومات المدرجة في مجموعة البيانات، أو التواصل مع الفرد، أو نشر أي معلومات صحية محمية أو الكشف عنها للعامة. |
| **Security** | **الأمن** |
| The Data Recipient agrees to use appropriate administrative, physical, and technical safeguards to prevent use or disclosure of the Data Set other than as provided for by this agreement. | يوافق متلقي البيانات على إستخدام الضمانات الإدارية، والمادية والفنية المناسبة للحيلولة دون إستخدام مجموعة البيانات أو الكشف عنها بخلاف ما هو منصوص عليه في هذه الإتفاقية. |
| - [All data will be stored in secure storage areas or on digital media that has been password protected, encrypted, or otherwise secured for storage and transfer.] | - [سيتم تخزين كافة البيانات في مناطق تخزين آمنة أو على وسائل إلكترونية تتم حمايتها بكلمة مرور، أو تشفيرها أو بخلاف ذلك تأمينها للتخزين والنقل]. |
| **Publications and Presentations** | **النشر والمطبوعات** |
| The Data Recipient should submit an application for publication to the Research and Studies - MOH prior to publication in local or international journals. | لا يحق للطرف المتلقي بنشر نتائج الدراسة في المجلات العلمية المحلية أو العالمية إلا بعد الحصول على موافقة خطية على النشر من إدارة البحوث والدراسات بوزارة الصحة |

| The parties signing below agree to the conditions enumerated above. | يوافق الأطراف الموقعون أدناه على الشروط التي تم تعدادها **أعلاه.** |
| --- | --- |
| **Authorized representative of the Provider or the facility releasing the data set:**  **Data Provider in MOH Facilities**  Signature of authorized representative of the provider or the facility releasing the data set | **الممثل المخول من قبل المزود أو المنشأة المصدرة لمجموعة البيانات:**  **هذا الجزء خاص بمزود البيانات بمنشئات وزارة الصحة**  توقيع الممثل المخول من قبل المزود أو المنشأة المصدرة لمجموعة البيانات |
| Name of authorized representative:  Title of authorized representative:  Recipient: Amal Khalil  Name of facility: king Saud bin Abdulaziz university for health sciences  Address: King Abdualaziz Medical city  Phone: 0595138896  e-mail: khalila@ksau-hs.edu.sa  Fax: -  Date: 12/10/2024 | إسم الممثل المخول:  منصب الممثل المخول:  المتلقي:  إسم المنشأة:  العنوان:  رقم الهاتف:  البريد الإلكتروني:  الفاكس: لا يوجد  التاريخ: |
| **To be fulfilled by the Principal Investigator:** | **يملأ بمعرفة الباحث الرئيس:** |
| Recipient Name: **Amal Khalil**  Recipient Institution: king Saud bin Abdulaziz university for health sciences  Address: King Abdualaziz Medical city  Phone: 0595138896  e-mail: khalila@ksau-hs.edu.sa  Fax: -  Date: **12/10/2024** | إسم المتلقي: .  مؤسسة المتلقي: Click or tap here to enter text.  العنوان: Click or tap here to enter text.  رقم الهاتف: Click or tap here to enter text.  البريد الإلكتروني: Click or tap here to enter text.  الفاكس: Click or tap here to enter text.  التاريخ: **12/10/2024** |
| **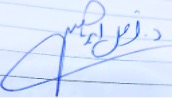**  Signature of Recipient | 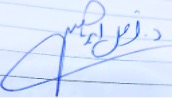  **توقيع المتلقي** |
