# Supplementary material for: The Polypharmacy Dilemma in Psychiatry: A Patient- Centered Mixed-Methods Exploration
Source: Research Square preprint supplement (doi:10.21203/rs.3.rs-6790258/v1), 2025-08-07
Supplement: Supplementary file 2 [file 94122fe2f5c117d0cbe767f6.pdf]

**الإدارة: إدارة التغيير والتحول بفرع وزارة الصحة بجده (قسم البحوث)**  
**الموضوع: الموافقة الأخلاقية**

سعادة مدير إدارة البحوث والدراسات بالتجمع الصحي الثاني  
السلام عليكم ورحمة الله وبركاته...

نفيدكم بأن الباحث الموضحة بياناته في الجدول التالي قد استوفى جميع الشروط التي تنص عليها اللائحة التنفيذية لأخلاقيات البحوث والصادرة من مدينة الملك عبدالعزيز للعلوم والتقنية ودليل الممارسة الأخلاقية الجيدة وقد تمت إجازته من قبل اللجنة المحلية لأخلاقيات البحوث بفرع الوزارة بجده (الموافقة المبينة) لاستكمال خطوات البحث وجمع البيانات .

| أسم الباحث الرئيسي              | امل خليل                                                                                                                                                                                |
|---------------------------------|-----------------------------------------------------------------------------------------------------------------------------------------------------------------------------------------|
| عنوان البحث                     | Understanding Healthcare Providers' Knowledge and Attitudes Toward Polypharmacy in Psychiatry Versus Psychiatric Patients' Perspectives on Medication Management: A Mixed-Methods Study |
| المنشآت المراد اجراء البحث فيها | مجمع إرادة للصحة النفسية- خدمات ارادة                                                                                                                                                   |
| رقم الموافقة                    | A02115                                                                                                                                                                                  |
| مدة البحث                       | ٦ اشهر فقط                                                                                                                                                                              |
| التاريخ                         | 01/01/2025                                                                                                                                                                              |
| رقم التواصل مع الباحث           | ٠٥٩٥١٣٨٨٩٦                                                                                                                                                                              |

ملاحظة مهمة:

- ١- ضرورة تقيد الباحث بالشروط التي تم الإقرار عليها في خطاب الموافقة الأخلاقية
- ٢- تزويد اللجنة المحلية لأخلاقيات البحوث بفرع وزارة الصحة بجدة بنتائج البحث والنسخة النهائية وذلك لاستكمال منح الباحث الموافقة النهائية (للتنشر)

وتفضلوا بقبول أطيب تحياتي

رئيس اللجنة المحلية لأخلاقيات البحوث بفرع وزارة

الصحة بجده

  
د / علا أكرم عبد الرشيد

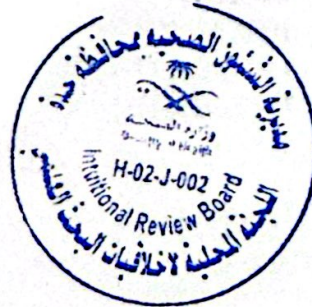



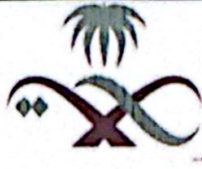

## اللجنة المحلية لأخلاقيات البحوث بصحة جدة

## Institutional Review Board

National Registration Number with NCBE-KACST, KSA: (H-02-J-002)

Approval Letter

Date:01/01/2025

IRB Log No: A02115

Category of Approval: Expedited

Dear Researcher

The IRB is pleased to inform you that your study mentioned below has been reviewed and approved. This letter gives you an ethical clearance to implement your study according to the approved documents and you still need to obtain administrative approval from the site/s where the study will be conducted.

|                                   |                                                                                                                                                                                                                 |             |                        |
|-----------------------------------|-----------------------------------------------------------------------------------------------------------------------------------------------------------------------------------------------------------------|-------------|------------------------|
| Protocol Title                    | Understanding Healthcare Providers' Knowledge and Attitudes Toward Polypharmacy in Psychiatry Versus Psychiatric Patients' Perspectives on Medication Management: A Mixed-Methods Study                         |             |                        |
| PI Name                           | Amal Khalil                                                                                                                                                                                                     | PI ID       | 2278005554             |
| PI Affiliation                    | Non-MOH                                                                                                                                                                                                         | PI E-mail   | khalila@ksau-hs.edu.sa |
| IRB Approved Documents (attached) | <input checked="" type="checkbox"/> Research proposal<br><input checked="" type="checkbox"/> Consent form<br><input checked="" type="checkbox"/> Data collection tool<br><input type="checkbox"/> Others, _____ |             |                        |
| Co-Investigators                  | # Name                                                                                                                                                                                                          | ID          |                        |
|                                   | Alhanouf Abdullah Almuhalbidi                                                                                                                                                                                   | 1119297909  |                        |
|                                   | Atheer Saeed Almarri                                                                                                                                                                                            | 1115303164  |                        |
|                                   | Hatun Hamid Alansari                                                                                                                                                                                            | 1121325029  |                        |
|                                   | Joud salehAlzahrani                                                                                                                                                                                             | 1170892929  |                        |
|                                   | Reema Tariq Almutairi                                                                                                                                                                                           | 1125113801  |                        |
|                                   | Shahad Salman Almutairi                                                                                                                                                                                         | 1118982584  |                        |
|                                   | Shaima Khaled Alzahrani                                                                                                                                                                                         | 1116364553  |                        |
| Study Site and Sample             | # Site                                                                                                                                                                                                          | Sample size |                        |
|                                   | # Eradah complex for mental health- Eradah services                                                                                                                                                             |             |                        |
| Total sample = # participants     |                                                                                                                                                                                                                 |             |                        |

IRB E-mail: IRB-JEDDAH@MOH.GOV.SA

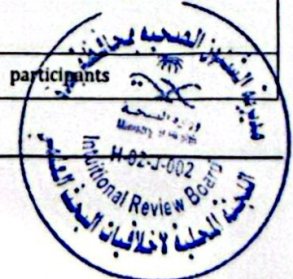



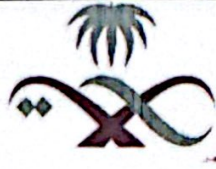

اللجنة المحلية لأخلاقيات البحوث بصحة جدة

**Institutional Review Board**

National Registration Number with NCBE-KACST, KSA: (H-02-J-002)

**Approval Conditions:**

1. The approval is valid for **one year** from the date of this letter.
2. If the research is not completed within the validation period, the PI will be required to apply for an extension from the IRB, two months before the expiry of the approval.
3. Abide by the rules and regulations of the Government of Saudi Arabia, NCBE, MOH and the IHC-GCP guidelines.
4. The research team should follow the IRB approved study documents, unless amendment(s) are requested and approved by the IRB.
5. All researchers are required to have a valid research ethics certificate on protecting human research participants.
6. The research team is not allowed to disclose personally identifiable data of the participants to any other party.
7. The PI is required to keep the study data securely for at least three years after the completion of the study.
8. The collected data should only be used for this research.
9. It is required to collect three copies of informed consent forms (unless waived) as follow:
  - I. One copy to be kept with the PI
  - II. One copy to be kept with the study participant
  - III. One copy for the IRB committee OR to be kept in the participant file in case of clinical research
10. The PI is required to submit a progress report **every six months**
11. The PI must ensure adequate close-out of the study.
12. Publication by any means is not allowed except after getting an approval letter from the IRB and MOH research department.

Sincerely yours,

*Signature*

**Dr. Ola Akram Abdulrashid ,MD**

**Chairman of Jeddah IRB, MOH, KSA.**

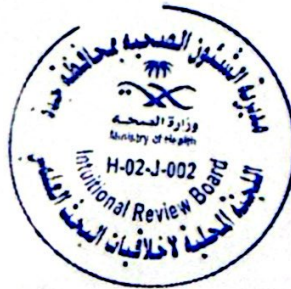

IRB E-mail: IRB-JEDDAH@MOH.GOV.SA
